# Supplementary material for: Genetic signature to provide robust risk assessment of psoriatic arthritis development in psoriasis patients
Source: PubMed Central journal article supplement (PMC6177414; doi:10.1038/s41467-018-06672-6), 2018-10-09
Supplement: 41467_2018_6672_MOESM2_ESM.pdf [file 41467_2018_6672_MOESM2_ESM.pdf]

## **Description of Additional Supplementary Files**

File Name: Supplementary Dataset 1

Description: Detailed Conditional Meta-Analysis Results. Abbreviations are as follows: Chr, chromosome. Cond., conditional; Uncond., unconditional. p-values were calculated using the Wald test in PLINK 2.0.

File Name: Supplementary Dataset 2

Description: Detailed 10-fold Conditional Meta-Analysis Results. Abbreviations are as follows: Chr, chromosome. p-values were calculated using the Wald test in PLINK 2.0.
